# Supplementary material
Source: publisher site journal article supplement (https://www.degruyterbrill.com/publication/isbn/9783486718065/downloadAsset/9783486718065_Buchinformation.pdf)
Supplement: Supplementary file 1 [file 9783486718065_Buchinformation.pdf]

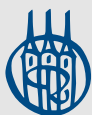

Oldenbourg  
Verlag

Ein Wissenschaftsverlag der  
Oldenbourg Gruppe

Horst Möller, Gregor Schöllgen (Hrsg.)

## Akten zur Auswärtigen Politik der Bundesrepublik Deutschland: 1980

Wissenschaftliche Leiterin: Ilse Dorothee Pautsch

Bearbeitet von Tim Geiger, Amit Das Gupta, Tim Szatkowski

2011. XC, 2115 Seiten, Leinen, in 2 Teilbänden

€ 148,00

ISBN 978-3-486-70219-4

Akten zur  
Auswärtigen Politik  
der Bundesrepublik  
Deutschland

1980

1. Januar bis  
31. Dezember

Herausgegeben  
im Auftrag des Auswärtigen Amts  
vom Institut für Zeitgeschichte

Oldenbourg

Ein Klimasturz im Ost-West-Verhältnis prägte das Jahr 1980: Der kurz zuvor verabschiedete NATO-Doppelbeschluss, die sowjetische Invasion in Afghanistan und die daraufhin ausgesetzte Ratifizierung des SALT-II-Vertrages drohten, die Ära der Entspannung zu beenden und zu einem neuen Rüstungswettlauf zu führen. Die Gefahr einer sowjetischen Intervention in Polen verdüsterte die internationalen Beziehungen zusätzlich, ebenso die Geiselnahme amerikanischer Botschaftsangehöriger in Iran. Die Bundesregierung bemühte sich, diese Spannungen abzubauen, etwa durch Bundeskanzler Schmidts Besuch in der UdSSR.

Herausgegeben im Auftrag des Auswärtigen Amts vom Institut für Zeitgeschichte

» *"Spannende Depeschen aus dem Jahr 1980 zeigen: Deutsche Diplomaten hielten Libyens Diktator Gaddafi schon damals für eine ,unstable Persönlichkeit'"*  
Sven-Felix Kellerhoff, <http://www.welt.de/politik/ausland/article12730218>

Rezensionsexemplare auf Anforderung:

Pressereferat Geisteswissenschaften – Ulrike Staudinger

Oldenbourg Wissenschaftsverlag | Rosenheimer Str. 145 | 81671 München

Tel.: +49 89 45051-211 | Fax: +49 89 45051-204 | [ulrike.staudinger@oldenbourg.de](mailto:ulrike.staudinger@oldenbourg.de)

[www.oldenbourg-verlag.de](http://www.oldenbourg-verlag.de)
